# Supplementary material for: Fabrication of ACP–CCS–PVA composite membrane for a potential application in guided bone regeneration
Source: Royal Society of Chemistry journal article supplement (doi:10.1039/d3ra04498j), 2023-01-01
Supplement: d3ra04498j1.pdf [file d3ra04498j1.pdf]

## Supporting Information

### **Fabrication of ACP-CCS-PVA composite membrane for a potential application in guided bone regeneration**

Qiaolin Du,<sup>‡a</sup> Jian Sun,<sup>‡a</sup> Yanyan Zhou,<sup>b</sup> Yadong Yu,<sup>c</sup> Weijing Kong,<sup>b</sup> Chaoqun Chen,<sup>a</sup> Yifeng Zhou,<sup>a</sup> Ke Zhao,<sup>a</sup> Changyu Shao<sup>\*b</sup> and Xinhua Gu<sup>\*a</sup>

<sup>a</sup> Department of Stomatology, The First Affiliated Hospital, College of Medicine, Zhejiang University, Hangzhou 310003, China

<sup>b</sup> Stomatology Hospital, School of Stomatology, Zhejiang University School of Medicine, Clinical Research Center for Oral Diseases of Zhejiang Province, Key Laboratory of Oral Biomedical Research of Zhejiang Province, Cancer Center of Zhejiang University, Hangzhou 310006, China

<sup>c</sup> Department of Chemistry, Zhejiang University, Hangzhou, Zhejiang 310027, China

<sup>‡</sup> Qiaolin Du and Jian Sun contributed equally to this work.

\*Corresponding Author: shaocy@zju.edu.cn, guxh@zju.edu.cn

**Number of pages:7**

**Number of figures:6**

**Number of tables:1**

# **1. Supplementary Experiment Section**

## **1. Brunauer-Emmett-Teller (BET)**

The specific surface area of the samples was measured by the Brunauer-Emmett-Teller (BET) method in the condition of liquid nitrogen using a specific surface area and porosity analyzer (AUTOSORB–IQ–MP, USA). Pore volume and pore size distribution were determined by the Barrett-Joyner-Halenda (BJH) method based on nitrogen desorption data.

## **2. Fourier transform-infrared spectroscopy (FT-IR)**

ATP-stabilized ACP nanoparticles were soaked in PBS solution (pH 7.4, 37°C) for designated times. The dried ACP nanoparticles were mixed with potassium bromide powder in a mass ratio of about 1:50 and ground under infrared light irradiation. The mixed powder was made into round flakes using a tablet machine and was analyzed by Fourier transform infrared spectroscopy (Spectrum 400, Perkin-Elmer, USA). The wavelength number of the FT-IR spectrum was set to 400-4000 $\text{cm}^{-1}$ , the resolution was 4  $\text{cm}^{-1}$ , and a total of 20 scans were performed.

## **3. Swelling Behavior**

Each sample's dry weight ( $W_d$ ) was measured immediately after vacuum drying (FreeZone®, Labconco, USA). The composite membranes were then immersed in 0.9% saline at 37°C until swelling equilibrium was reached and the expansion weight ( $W_s$ ) was determined. The swelling ratio (SR) of each sample is calculated as follows:  $SR = ((W_s - W_d) / W_d) \times 100\%$ .

#### 4. Cell viability

Fibroblast L929 cells (Cellbank of Chinese Science Academy, China) were incubated in high-glucose Dulbecco's modified Eagle medium (DMEM) (Sigma, USA) supplemented with 10% FBS (GIBCO, USA), 100 mg/ml streptomycin and 100 U/mL penicillin in a humidified atmosphere of 5% CO<sub>2</sub> at 37 °C. The medium was replaced every 2–3 days, and the cells were passaged when the density reached 80–90% confluence.

Cell viability was tested using a CCK-8 assay (Dojindo, Japan). The composite membranes were placed in 48-well plates, and  $0.5 \times 10^4$  cells/well were seeded into each well. The O.D. value of the experimental group at 450 nm was measured with a microplate reader (PerKinElmer, USA). Cell viability was obtained using the following formula: percentage of cell viability =  $(A_{\text{treatment}} - A_{\text{blank}}) / (A_{\text{control}} - A_{\text{blank}}) \times 100\%$  (where, A = absorbance).

## 2. Supplementary Figures

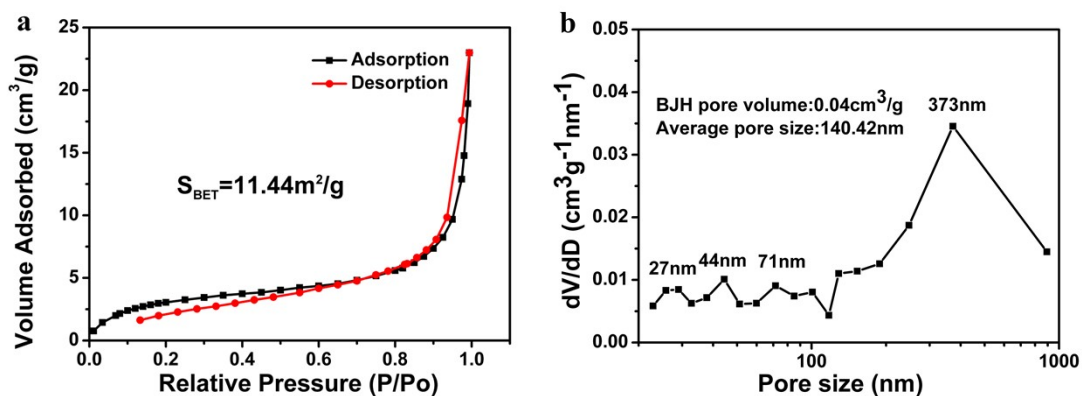

**Fig. S1** (a) N<sub>2</sub> adsorption-desorption isotherms and (b) Barrett-Joyner-Halenda (BJH) desorption pore size distribution curve of 10 wt% ACP-CCS-PVA composite membranes.

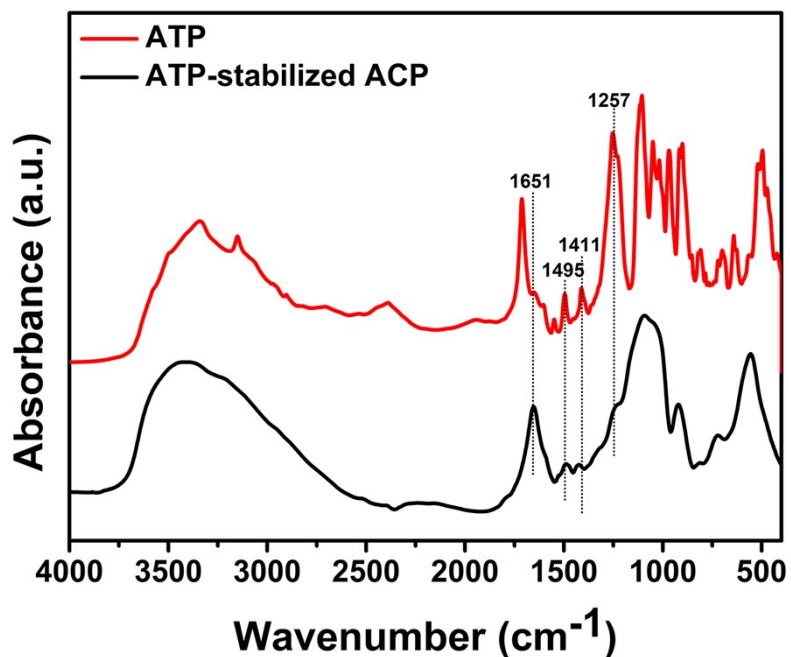

**Fig. S2** FTIR spectra of the ATP-stabilized ACP nanoparticles and ATP.

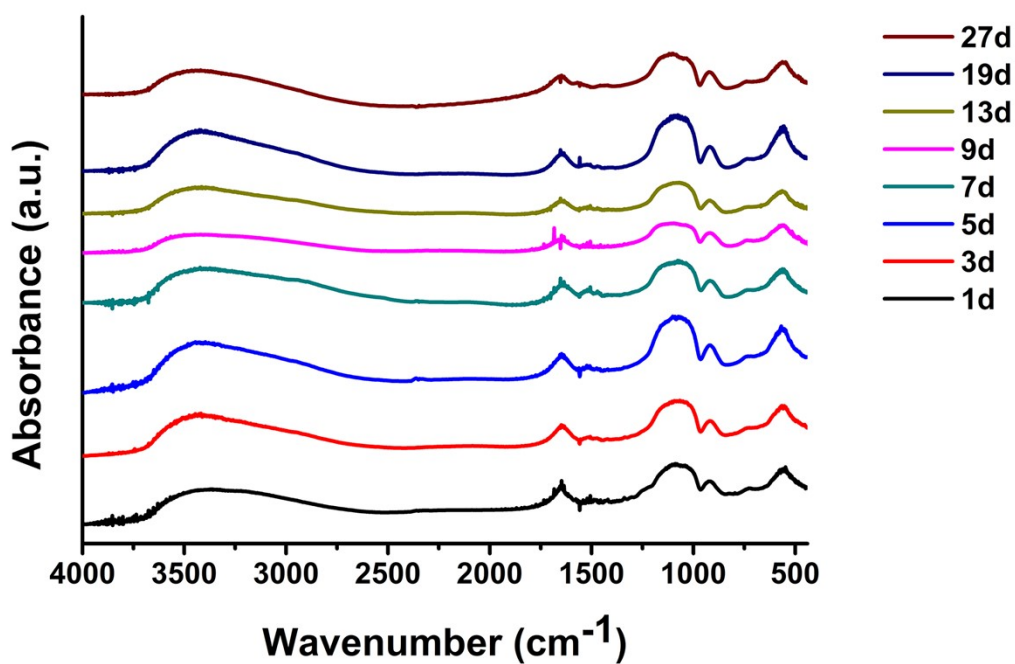

**Fig. S3** FTIR spectra of the ATP-stabilized ACP nanoparticles after soaking in PBS solution (pH 7.4) for designated times.

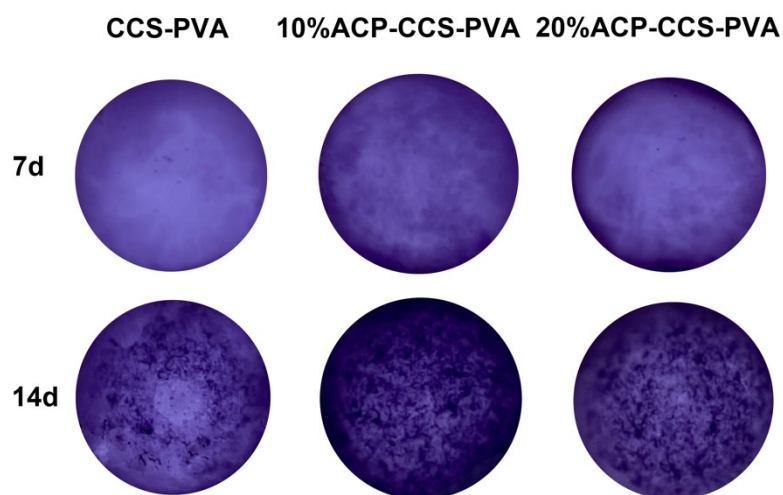

**Fig. S4** FTIR spectra of the ATP-stabilized ACP nanoparticles after soaking in PBS solution (pH 7.4) for designated times.

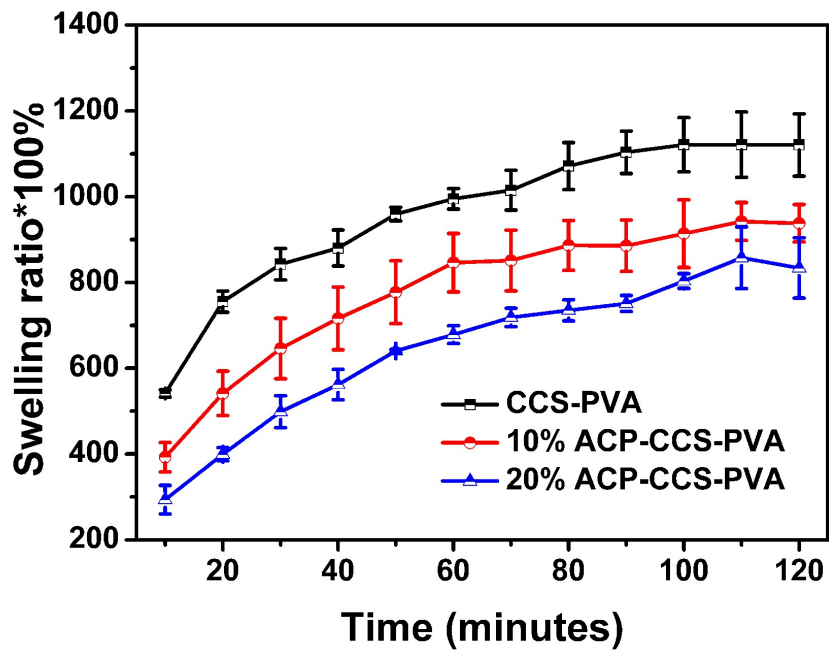

Fig. S5 The swelling ratio of composite membranes with different weight fractions of ACP.

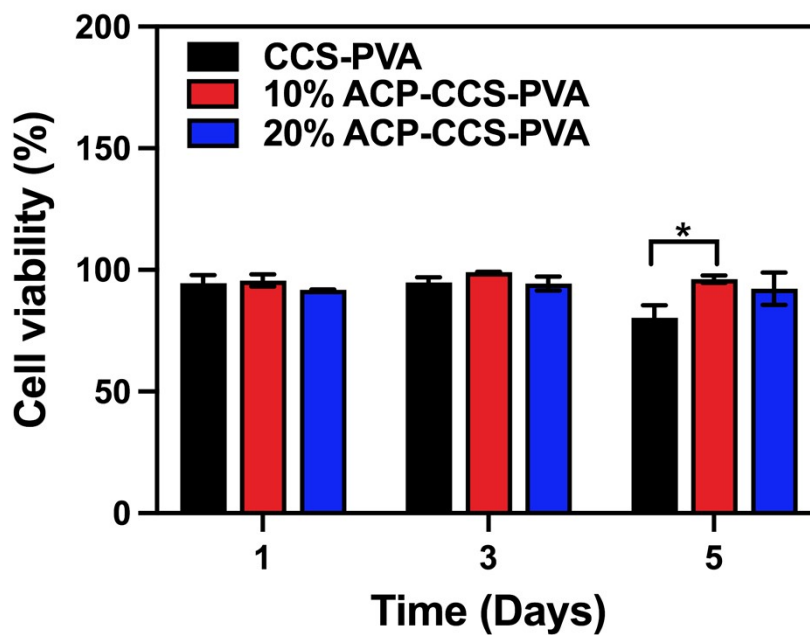

Fig. S6 Cell viability of CCS-PVA, 10wt%, and 20wt% ACP-CCS-PVA composite membranes (\*P<0.05, n=3).

**Table. S1** Genes and primer sequences

| <b>Gene</b> | <b>Primer</b> | <b>Sequence (5' - 3')</b> |
|-------------|---------------|---------------------------|
| GAPDH       | Forward       | GGAGAGTGTTTCCTCGTCCC      |
|             | Reverse       | ACTGTGCCGTTGAATTTGCC      |
| ALP         | Forward       | ATCTTTGGTCTGGCTCCCATG     |
|             | Reverse       | TTTCCCGTTCACCGTCCAC       |
| RUNX2       | Forward       | AAATGCCTCCGCTGTTATGAA     |
|             | Reverse       | GCTCCGGCCCACAAATCT        |
| OPN         | Forward       | CTCACATGAAGAGCGGTGAG      |
|             | Reverse       | TTCCTGGCTCTCTTTGGAA       |
| OSX         | Forward       | CCCTTCTCAAGCACCAATGG      |
|             | Reverse       | AGGGTGGGTAGTCATTTGCATAG   |
